# Supplementary material for: Headspace solid-phase microextraction comprehensive 2D gas chromatography-time of flight mass spectrometry (HS-SPME-GC × GC-TOFMS) for origin traceability of the genus Hymenaea resinites
Source: RSC Adv. 2023 May 9;13(21):14150–8. doi: 10.1039/d3ra00794d (PMC10168135; doi:10.1039/d3ra00794d)
Supplement: RA-013-D3RA00794D-s002 [file RA-013-D3RA00794D-s002.xlsx]

## Sheet: Sheet1
Supplementary Table. S3: Key biomarkers for distinguishing the different groups of copal and amber.
Number	Compound	1D(min)	2D(s)	CAS	Molecular formula	Match	R.Match	RI	NISTRI	Characteristic mass spectral ions	amber and copal samples
											D1	D2	D3	D4	D5	D6	D7	D8	D9	M1	M2	M3	M4	M5	M6	M7	M8	M9	M10	C1	C2	C3
1	β-Longipinene	51.4	0.77	41432-70-6	C15H24	841	849	1385	1403	41(100), 105(99), 91(86), 119(72),79(58), 120(40)	1.673	0	0.334	0	0	1.9	0.391	0.226	0.296	0	0	0	0	0	0	0	0	0	0	4.574	0.772	2.901
2	Ylangene	47.2	0.745	14912-44-8	C15H24	766	811	1336	1372	41(100), 91(69), 105(62), 77(48), 119(33)	0.117	0	0.076	0	0	0.226	0	0	0	0	0	0	0	0	0	0	0	0	0	0	0	0
3	1,6,9-Tetradecatriene	47.13	0.419	61233-71-4	C14H24	818	828	1335	―	41(100), 81(65), 67(48), 135(47),55(42), 95(37)	0.476	0	0.254	0	0	0.797	0.172	0.341	0.178	0	0	0	0	0	0	0	0	0	0	0	0	0
4	Tricyclo[4.1.0.0(2,4)]heptane, 3,3,7,7-tetramethyl-5-(2-methyl-1-propenyl)-	47.93	0.784	56348-21-1	C15H24	838	839	1345	―	41(100), 91(86), 161(83), 105(67),55(40), 133(31)	5.112	0	0.188	0	0	5.821	2.524	0.194	3.133	0	0	0	0	0	0	0	0	0	0	0	0	0
5	Tricyclo[7.2.0.0(3,8)]undec-4-ene, 4,8,11,11-tetramethyl-	49.93	0.62	―	C15H24	917	919	1369	―	107(100), 41(60), 91(50), 133(37),148(36), 80(34)	4.627	0	8.468	0	0	5.296	2.762	4.183	2.099	0	0	0	0	0	0	0	0	0	0	0	0	0
6	Caryophyllene	51.8	0.841	87-44-5	C15H24	870	882	1391	1419	41(100), 93(77), 79(65), 106(48),67(44), 55(39)	2.323	0	6.795	0	0	7.864	1.386	3.329	3.195	0	0	0	0	0	0	0	0	0	0	0	0	0
7	(Z,E)-α-Farnesene	52.8	0.926	26560-14-5	C15H24	853	865	1403	1483	41(100), 119(97), 91(68), 105(52),77(51), 55(36)	0.713	0	0.476	0	0	0.612	0.223	1.192	0.065	0	0	0	0	0	0	0	0	0	0	0	0	0
8	γ-Gurjunene	55.27	0.972	22567-17-5	C15H24	860	872	1433	1473	41(100), 91(82), 105(82), 77(53), 55(40), 119(37)	0.114	0	0.326	0.595	0	0	0	0.122		0	0	0	0	0	0	0	0	0	0	0.158	3.005	0.084
9	α-Springene	94.8	2.121	473-13-2	C15H24	732	769	1990	―	95(100), 41(84), 55(54), 107(49),79(38), 67(34)	1.766	0.594	0.326	0.15	0.193	1.727	0.855	2.373	2.232	0	0	0	0	0	0	0	0	0	0	0	0	0
10	Ledane	53.07	0.7	28580-43-0	C15H26	800	801	1406	1373	41(100), 81(83), 67(54), 55(51),107(28)	0.892	0	2.479	0	1.083	4.526	1.855	0.795	0.802	0	2.765	4.479	0.129	0	0.157	0	0.119	0.147	2.751	0	0	0
11	β-Curcumene	56.07	0.83	1461-02-5	C15H24	861	908	1443	1448	119(100), 41(51), 91(36), 105(20)	0.075	0	0.17	0.593	0	0.379	2.488	0.321	0.048	0	0	0	0	0	0	0	0	0	0	0	0	0
12	cis-Z-α-Bisabolene epoxide	58.27	1.527	―	C15H24O	788	789	1470	―	43(100), 91(32), 79(29), 55(25), 107(23)	0.082	0	0.17	0	0	0.129	0	0.238	0.079	0	0	0	0	0	0	0	0	0	0	0	0	0
13	1,1,4,5,6-Pentamethyl-2,3-dihydro-1H-indene	61.67	2.368	16204-67-4	C14H20	883	905	1513	1523	131(100), 173(81), 41(56), 91(44),77(42), 115(36)	0.086	0	0.045	0.915	1.529	0.165	0.358	0.169	0.04	31.9	20.929	51.96	6.344	48.22	16.029	57.92	43.571	48.148	43.79	0	0	0
14	Caryophyllene oxide	66.47	1.79	1139-30-6	C15H24O	823	841	1576	1581	43(100), 55(40), 67(36), 81(28),95(22)	0.269	0	0.204	0	0	0.045	1.202	0.3	0.096	0	0	0	0	0	0	0	0	0	0	0	0	0
15	Isolongifolan-8-ol	69.93	2.32	1139-08-8	C15H26O	817	823	1622	―	41(100), 207(63), 55(59), 123(43),81(37), 95(33)	2.011	0	6.226	0	0	1.002	0.125	1.926	0.822	0	0	0	0	0	0	0	0	0	0	0	0	0
16	Tricyclo[4.3.0.0(7,9)]nonane, 2,2,5,5,8,8-hexamethyl-, (1α,6β,7α,9α)-	77.2	0.933	54832-82-5	C15H26	764	769	1723	―	41(100), 191(67), 95(58), 69(55),135(42), 107(35)	2.452	0	16.113	0.613	0.299	1.427	2.209	12.458	2.113	0	0	0	0	0	0	0	0	0	0	0	0	0
17	Cycloheptane, 4-methylene-1-methyl-2-(2-methyl-1-propen-1-yl)-1-vinyl-	81.53	0.97	―	C15H24	806	823	1786	―	41(100), 55(77),107(62), 93(59),81(52)	0.965	1.153	0.167	9.055	22.732	2.262	1.043	0.676	1.488	0	3.936	0	0	0	0	0	0	0	0	0	0	0
18	Patchoulane	83.4	1.362	25491-20-7	C15H26	771	773	1813	―	41(100), 69(23), 95(49), 121(38),55(38), 107(37)	2.963	7.071	2.774	1.458	1.74	1.958	2.736	5.519	3.026	1.866	5.319	4.158	0.809	7.325	1.221	3.792	0.655	1.427	3.992	0	0.072	0
19	Aromadendrene oxide-(1)	84.73	1.309	―	C15H24O	713	723	1833	―	41(100), 69(47), 95(41), 55(36),121(35), 107(34)	0.556	1.914	2.293			0.503	0.158	1.269	0.084	0	0	0	0	0	0	0	0	0	0	0	0	0
20	2,4a,5,8a-Tetramethyl-1,2,3,4,4a,7,8,8a-octahydronaphthalen-1-ol	85.8	1.356	20558-22-9	C14H24O	675	675	1850	―	95(100), 41(44), 107(34), 55(26),69(18), 121(14)	67.05	60.049	36.255	45.536	43.869	40.39	51.07	46.101	75.45	0	0	0	0	0	0	0	0	0	0	0	0.373	0
21	1H-Indene, 2,3-dihydro-1,1,5,6-tetramethyl-	59	2.591	942-43-8	C13H18	899	902	1480	―	159(100), 128(27), 115(25), 131(21),144(17), 77(16)	0	0	0	0	0	0	0	0.143	0	7.26	1.299	8.681	0.154	20.925	1.152	10.72	19.265	18.633	13.258	0	0	0
22	Benzene, (1,1,2-trimethylpropyl)-	55.67	1.179	26356-11-6	C12H18	773	794	1438	―	119(100), 91(32), 41(25), 105(9),43(1)	0	0	0	0	0	0	0	0	0	1.942	0.413	2.315	0.023	3.344	0.335	1.436	3.101	2.585	2.64	0	0	0
23	4-Butyl-indan-5-ol	56.8	1.482	―	C13H18O	802	802	1452	―	147(100), 133(16), 115(15)	0	0	0	0	0	0	0	0	0	1.193	0.31	0.781	0	3.266	0.139	0.942	2.611	2.081	1.698	0	0	0
24	α-Curcumene	54.87	1.973	644-30-4	C15H22	728	740	1428	1473	119(100), 132(44), 91(34),41(12)	0	0	0	10.114	0	0	0	0	0	0	0.437	1.3	0	0	0	1.138	0.066	0	2.341	0.59	2.905	0.541
25	α-Cubebene	47.8	0.58	17699-14-8	C15H24	933	934	1343	1351	105(100), 119(71), 41(52), 161(49), 91(48)	0	0	0	0	0	0	0	0	0	0	0	0	0	0	0	0	0	0	0	15.299	0.978	17.992
26	Copaene	50.3	0.24	3856-25-5	C15H24	929	932	1373	1376	105(100), 119(76), 91(74), 77(45),161(37)	0	0	0	0	0	0	0	0	0	0	0	0	0	0	0	0	0	0	0	50.912	4.218	39.674
27	δ-Cadinene	57.2	0.974	483-76-1	C15H24	855	882	1470	1516	105(100), 161(73), 91(72), 41(70),81(57),	0	0	0	0	0	0	0	0	0	0	0	0	0	0	0	0	0	0	0	9.241	20.426
28	Benzene, 1-(1,5-dimethylhexyl)-4-methyl-	56.2	0.78	1461-02-5	C15H24	913	935	1445	1448	119(100), 91(25), 105(21), 41(21),77(11), 204(10)	0	0.648	0	7.906	0.474	0	0	0	0	0	0	0	0	0	0	0	0	0	0	2.564	8.981	2.076
29	α-Muurolene	63.47	1.167	31983-22-9	C15H24	898	909	1537	1528	105(100), 41(40), 91(38), 81(30), 161(23), 119(21)	0	0	0	0	0	0	0	0	0	0	0	0	0	0	0	0	0	0	0	1.52	14.027	0.993
1D(min): Retention time on first column
2D(s): Retention time on second column
RI: A series of alkanes (C7-C30) was used to calculate the retention indices
NISTRI：Relative retention indices taken from NIST17
